# Supplementary material
Source: HighWire-hosted journal article supplement (http://www.qdcxjkg.com/highwire/filestream/128233/field_highwire_adjunct_files/0/ERJ-00574-2015_Figure_S1.pdf)
Supplement: ERJ-00574-2015_Figure_S1.pdf [file ERJ-00574-2015_Figure_S1.pdf]

## Supplemental Figure 1

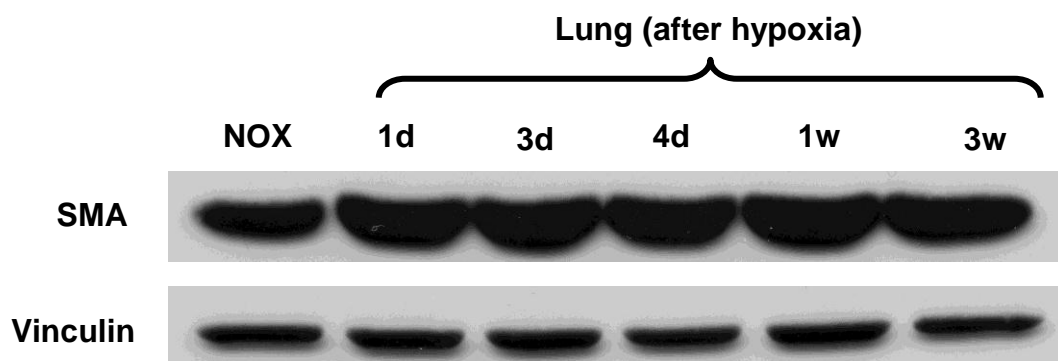

**Supplemental Figure 1.** Analysis of SMA expression after hypoxic treatment in mouse lung. **A:** Western blot (60  $\mu$ g cytosolic protein) show constant SMA expression during hypoxic exposure between 1d and 3w. Vinculin was used as loading control.
